# Supplementary material
Source: publisher figshare collection journal article supplement (https://tandf.figshare.com/ndownloader/files/15258761)
Supplement: Supplementary file 1 [file 15258761]

**SUPPORTING MATERIALS**

**Occurrence of Fipronil in residential house dust in presence and absence of pets: a hint for a comprehensive toxicological assessment**

Cecilia Testa1, Severyn Salis1, Nicola Rubattu1, Paola Roncada2, Roberto Miniero3a, and Gianfranco Brambilla3b

*1 Istituto Zooprofilattico Sperimentale della Sardegna, Department of Food Security, Sassari, Italy*

*2 Department of Veterinary Medical Sciences, University of Bologna, via Tolara di Sopra 50, 40064 Ozzano Emilia (BO), Italy*

*3 Istituto Superiore di Sanità, a Environment and Health Dept.; b Veterinary Public Health, Food Safety, and Nutrition Dept. Viale Regina Elena, 299 I-00161 Rome, Italy*

| 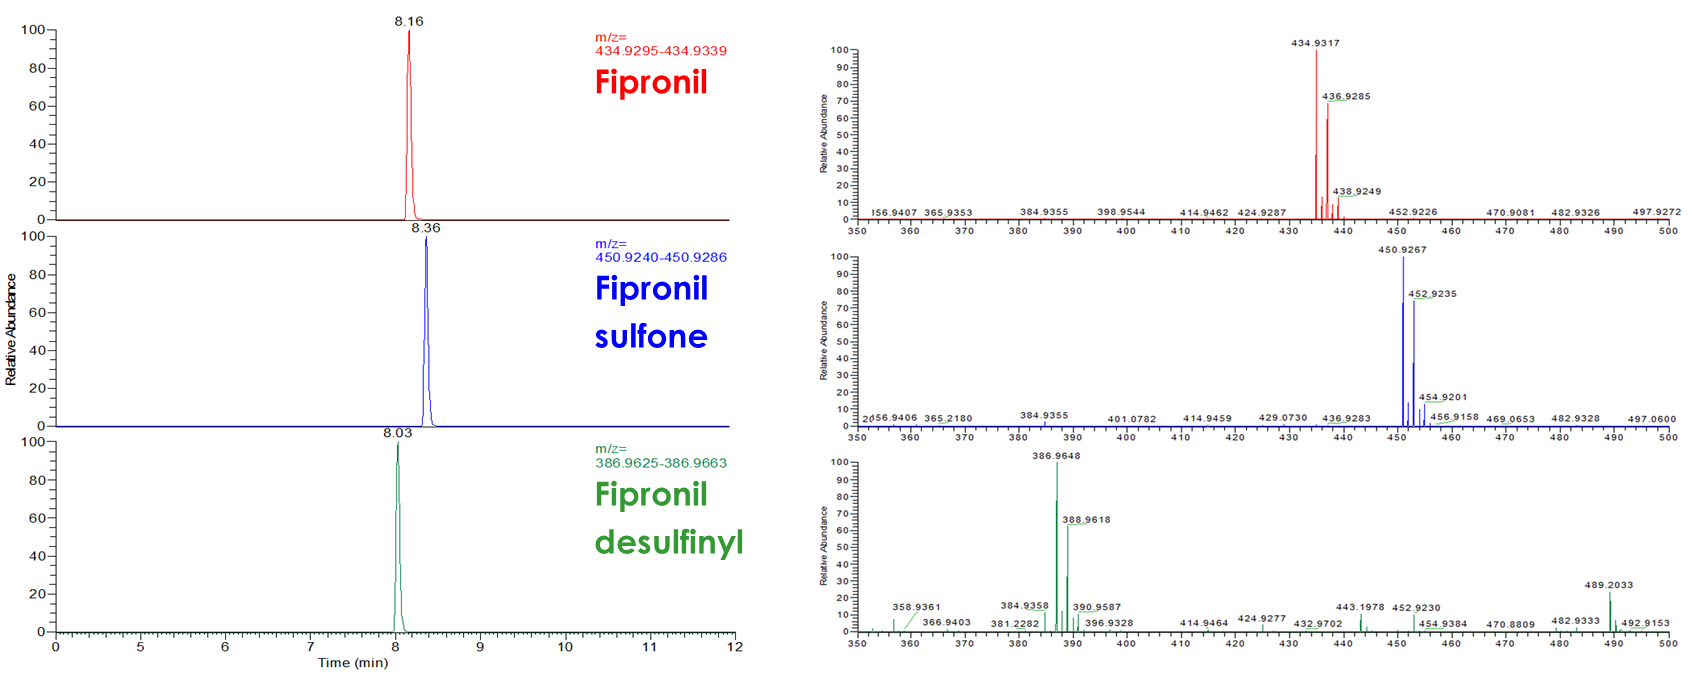 |
| --- |
| **Figure 1S.** Chromatograms and High-resolution mass spectra for Fipronil, Sulfone, and Desulfinyl. |

**Table 1S.** Molecular, retention time, accurate mass, mass errors of Fipronil and its products.

| Compound Molecular formula RT (min) Precursor ion Mass error  Theoretical Experimental (ppm) |
| --- |
| Fipronil C12H4Cl2F6N4OS 8.16 434.9314 434.9317 0.3 |
| Fipronil-sulfone C12H4Cl2F6N4O2S 8.36 450.9263 450.9267 0.4 |
| Fipronil desulfinyl C12H4Cl2F6N4 8.03 386.9639 386.9648 0.9 |

**Table 2S.** Computed use of Fipronil as veterinary drug per year in cats and dogs.

| **Population**  **dogs (N)** | **Treated**  **%** | **Treated**  **(N)** | **kg bw**  **mean** | **Posology**  **mg/kg per month** | **Treatments**  **per year**  **(N)** | **F use**  **mg per year** |
| --- | --- | --- | --- | --- | --- | --- |
| 10,717,479 | 62 | 6,612,685 | 17.07 | 6.7 | 8  8  8  8 | 6,273,586,080 |
| 82 | 8,756,180 | 8,307,163,415 |
| **Population**  **cats (N)** |  |  |  |  |  |
| 6,967,000 | 62 | 4,298,639 | 4.42 | 6.7 | 1,018,399,163 |
| 82 | 5,692,039 | 1,348,512,344 |

**Table 3S.** Descriptors of total Fipronil presence in house dust in the presence of pets (pets+), accounting for the availability or not (g+/g-) of a private garden in the household. Test statistic = 0.430356; P value = 0.511814.

|  | ***Count*** | ***Average*** | | ***Median*** | ***Standard deviation*** | | ***MAD*** | | ***Minimum*** | ***Maximum*** | ***Lower quartile*** |
| --- | --- | --- | --- | --- | --- | --- | --- | --- | --- | --- | --- |
| **pet+ g-** | 22 | 3298.77 | | 832.61 | 5756.04 | | 772.96 | | 15.0 | 22605.9 | 155.91 |
| **pet+ g+** | 38 | 7499.18 | | 442.48 | 15672.6 | | 424.7 | | 15.0 | 67798.6 | 54.48 |
| **Total** | 60 | 6032.37 | | 466.7 | 13182.1 | | 448.92 | | 15.0 | 67798.6 | 75.68 |
|  | ***Upper quartile*** | | ***Stnd. skewness*** | | | ***Stnd. kurtosis*** | |
| **pet+ g-** | 3775.49 | | 4.92505 | | | 6.21046 | |
| **pet+ g+** | 6090.57 | | 6.7734 | | | 8.26557 | |
| **Total** | 4284.5 | | 10.0411 | | | 16.1735 | |
